# Supplementary material for: Geographically divergent trends in snow disappearance timing and fire ignitions across boreal North America
Source: Copernicus journal article supplement (doi:10.5194/bg-21-109-2024), 2024-01-05
Supplement: Supplementary file 1 [file bg-21-109-2024-supplement.zip]

Archive with 3 entries (3 files):
- bg-21-109-2024-supplement-title-page.pdf
- Supplementary_figures_revised.docx
- Supplementary_tables_revised.docx
