# Supplementary material for: Geographically divergent trends in snow disappearance timing and fire ignitions across boreal North America
Source: Copernicus journal article supplement (doi:10.5194/bg-21-109-2024), 2024-01-05
Supplement: Supplementary file 1 [file bg-21-109-2024-supplement.zip › bg-21-109-2024-supplement-title-page.pdf]

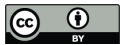

*Supplement of*

## **Geographically divergent trends in snow disappearance timing and fire ignitions across boreal North America**

**Thomas D. Hessilt et al.**

*Correspondence to:* Thomas D. Hessilt (t.d.hessilt@vu.nl)

- [bg-21-109-2024-supplement-title-page.pdf](#)
- [Supplementary\\_figures\\_revised.docx](#)
- [Supplementary\\_tables\\_revised.docx](#)

The copyright of individual parts of the supplement might differ from the article licence.
