# Supplementary material for: Geographically divergent trends in snow disappearance timing and fire ignitions across boreal North America
Source: Copernicus journal article supplement (doi:10.5194/bg-21-109-2024), 2024-01-05
Supplement: Supplementary file 1 [file bg-21-109-2024-supplement.zip › Supplementary_tables_revised.docx]

**Table S1** Snow disappearance from Moderate Resolution Imaging Spectroradiometer (MODIS) and National Snow and Ice Data Center (NSIDC) and ignition trends for all ecoregions. All trends are retrieved using simple linear regressions. Values in **bold** indicate significance level at *p* < 0.05, and values in *italic* represent significance level at *p* < 0.1.

| Ecoregion | Area (104 km2) | MODIS snow disappearance trend 2001-2019 (days dec-1) | NSIDC snow disappearance trend  1980-2019 (days dec-1) | NSIDC snow disappearance trend 1980-2000 (days dec-1) | Number of ignitions 2001-2019 | Number of ignition trend  1980-2019 (×10-6 ignitions km-2 dec-1) | Ignition timing trend, all ignitions  2001-2019 (days dec-1) |
| --- | --- | --- | --- | --- | --- | --- | --- |
| Alaska Boreal Interior | 4.23 | -3.06 | **-2.61** | -0.35 | 962 | **2.32** | **-6.29** |
| Alaska Tundra | 3.82 | **-7.87** | **-2.71** | *-0.48* | 121 | **0.36** | *-9.01* |
| Boreal Cordillera | 7.45 | -4.11 | -0.48 | -0.25 | 1073 | 0.52 | -1.82 |
| Boreal Plain | 6.88 | 0.22 | 1.36 | 0.02 | 2285 | 0.02 | **11.01** |
| Brooks Range Tundra | 1.59 | -3.79 | **-2.03** | -0.21 | 66 | *0.24* | -3.15 |
| Cold Deserts | 0.53 | 0.35 | -2.20 | -1.35 | 1002 | **11.47** | **11.66** |
| Hudson Plain | 3.72 | 4.81 | -0.40 | 0.19 | 499 | 0.02 | **-4.17** |
| Marine West Coast Forest | 5.19 | -10.77 | -0.65 | -0.57 | 705 | **0.72** | **-10.31** |
| Mixed Wood Shield | 3.90 | 3.43 | *2.07* | 0.15 | 570 | -0.50 | **-24.78** |
| Eastern Softwood Shield | 7.38 | 2.96 | 1.27 | -0.01 | 836 | 0.36 | -0.39 |
| Western Softwood Shield | 7.56 | -0.35 | -0.23 | 0.02 | 2050 | -0.95 | **-5.18** |
| Taiga Cordillera | 3.01 | **-5.17** | -1.72 | -0.31 | 411 | 0.64 | -3.09 |
| Taiga Plain | 6.29 | **-4.78** | -1.48 | -0.11 | 1178 | **1.20** | **-17.72** |
| Eastern Taiga Shield | 7.55 | **7.61** | -0.30 | -0.01 | 481 | -0.17 | -2.42 |
| Western Taiga Shield | 6.29 | -3.07 | -0.76 | 0.38 | 1143 | *1.27* | **3.07** |
| Western Cordillera | 6.43 | -2.96 | -0.90 | -0.34 | 4526 | **7.08** | 2.05 |

**Table S2** The mean difference (seven consecutive days of snow disappearance subtracted from 14 consecutive days of snow disappearance) per ecoregion and ignition for comparison of snow disappearance timing retrieval with a threshold of seven days snow free pixel and to 14 days snow free pixel.

| Ecoregion | Ecoregion, mean difference | Ignition, mean difference |
| --- | --- | --- |
| Alaska Boreal Interior | 3.96 | 0.04 |
| Alaska Tundra | 28,87 | 0.66 |
| Boreal Cordillera | 2.17 | 0.28 |
| Boreal Plain | 7.34 | -0.01 |
| Brooks Range Tundra | -0.05 | 0.41 |
| Cold Deserts | 23.23 | -0.22 |
| Hudson Plain | 0.16 | 0.07 |
| Marine West Coast Forest | 49.97 | 1.15 |
| Mixed Wood Shield | 10.08 | 0.12 |
| Eastern Softwood Shield | 14.75 | 0.08 |
| Western Softwood Shield | -0.39 | 0.02 |
| Taiga Cordillera | 1.86 | 0.05 |
| Taiga Plain | 5.20 | -0.05 |
| Eastern Taiga Shield | -0.15 | -0.01 |
| Western Taiga Shield | 1.42 | 0.09 |
| Western Cordillera | 26.82 | 0.13 |

**Table S3** The retrieval of ignitions from the Arctic-Boreal Vulnerability Experiment Fire Emission Database (ABoVE-FED) database compared to Alaska Fire Emission Database (AKFED) version 2 ignition data (Scholten et al., 2021). The ignition algorithm relies on buffered burned area and a minimum search radius. We tested different combinations of buffers (1 km and 2 km), minimum search radius (5 km, 7.5 km, 10 km, and 15 km), and minimum burned area (removal of 0 pixels, 1 pixel, and 2 pixels from the ABoVE-FED). The comparison of the ABoVE-FED ignition retrieval to AKFED ignition retrieval was performed over Alaska, Yukon, and the Northwest Territories between 2001 and 2018. The absolute sum of ignitions and overlap between the two datasets as well as the relative differences between the datasets were analyzed. Based on these performance metrics, we chose for the ignition retrieval with 2 km buffers, within a 7.5 km minimum search radius, and with a minimum burned area of approximately 64 ha (highlighted in **bold**).

|  | Total | Overlap | % of AKFED | % overlap |
| --- | --- | --- | --- | --- |
| AKFED | 3624 |  |  |  |
| ABoVE |  |  |  |  |
| 0 pixels removed |  |  |  |  |
| 1km buffer, 5km search radius | 4957 | 2953 | 136.78% | 81.48% |
| 1km buffer, 7.5km search radius | 4566 | 2888 | 125.99% | 79.69% |
| 1km buffer, 10km search radius | 4452 | 2858 | 122.85% | 78.86% |
| 1km buffer, 15 search radius | 4353 | 2824 | 120.12% | 77.92% |
|  |  |  |  |  |
| 2km buffer, 5km search radius | 4737 | 2900 | 130.71% | 80.02% |
| 2km buffer, 7.5km search radius | 4327 | 2817 | 119.40% | 77.73% |
| 2km buffer, 10km search radius | 4196 | 2768 | 115.78% | 76.38% |
| 2km buffer, 15 search radius | 4053 | 2700 | 111.84% | 74.50% |
|  |  |  |  |  |
| 1 pixel removed |  |  |  |  |
| 1km buffer, 5km search radius | 4485 | 2895 | 123.76% | 79.88% |
| 1km buffer, 7.5km search radius | 4094 | 2830 | 112.97% | 78.09% |
| 1km buffer, 10km search radius | 3980 | 2800 | 109.82% | 77.26% |
| 1km buffer, 15 search radius | 3881 | 2766 | 107.09% | 76.32% |
|  |  |  |  |  |
| 2km buffer, 5km search radius | 4342 | 2843 | 119.81% | 78.45% |
| 2km buffer, 7.5km search radius | 3934 | 2760 | 108.55% | 76.16% |
| 2km buffer, 10km search radius | 3804 | 2712 | 104.97% | 74.83% |
| 2km buffer, 15 search radius | 3491 | 2356 | 96.33% | 65.01% |
|  |  |  |  |  |
| 2 pixels removed |  |  |  |  |
| 1km buffer, 5km search radius | 4218 | 2820 | 116.39% | 77.81% |
| 1km buffer, 7.5km search radius | 3827 | 2755 | 105.60% | 76.02% |
| 1km buffer, 10km search radius | 3713 | 2725 | 102.46% | 75.19% |
| 1km buffer, 15 search radius | 3614 | 2691 | 99.72% | 74.25% |
|  |  |  |  |  |
| 2km buffer, 5km search radius | 4105 | 2773 | 113.27% | 76.52% |
| **2km buffer, 7.5km search radius** | **3698** | **2690** | **102.04%** | **74.23%** |
| 2km buffer, 10km search radius | 3568 | 2642 | 98.45% | 72.90% |
| 2km buffer, 15 search radius | 3236 | 2181 | 89.29% | 60.18% |

**Table S4** Relative humidity (%), actual and saturation vapor pressure (hPa) were calculated using the following equations.

| Variable | Dependency | Equation |
| --- | --- | --- |
| Relative humidity (RH) (%) | Existing (*e*) and saturation vapor pressure (*es*) |  |
| Actual vapor pressure (hPa) | 2m dew point temperature (*Td*) |  |
| Saturation vapor pressure (hPa) | 2m air temperature (*T*) |  |
| Vapor pressure deficit (VPD) | Saturation vapor pressure (*es*) and relative humidity *(RH*) |  |

**Table S5** Results from the linear mixed-effect model for predicting snow disappearance timing of the 20th percentile of the ignition timing distribution for all ecoregions combined, ecoregions with earlier snow disappearance timing trends, and ecoregions with later snow disappearance timing trends. The values in **bold** indicate significant predictors at *p* < 0.05 and values in *italic* represent significant predictors at *p* < 0.1.

| **All** | Value | Standard error | Degrees freedom | t-value | p-value |
| --- | --- | --- | --- | --- | --- |
| Intercept | 0.00 | 0.05 | 277 | 0.00 | 1.00 |
| Precipitation | 0.03 | 0.06 | 277 | 0.60 | 0.55 |
| No precipitation | 0.17 | 0.29 | 277 | 0.58 | 0.56 |
| Rainfall | 0.21 | 0.19 | 277 | 1.12 | 0.26 |
| Snowfall | 0.42 | 0.34 | 277 | 1.21 | 0.22 |
| Relative humidity | 0.02 | 0.06 | 277 | 0.32 | 0.75 |
| Temperature | **-0.46** | **0.08** | **277** | **-5.72** | **0.00** |

| **Early snow disappearance** | Value | Standard error | Degrees freedom | t-value | p-value |
| --- | --- | --- | --- | --- | --- |
| Intercept | -0.01 | 0.06 | 170 | -0.11 | 0.92 |
| Precipitation | -0.00 | 0.09 | 170 | -0.05 | 0.96 |
| No precipitation | 0.43 | 0.37 | 170 | 1.17 | 0.24 |
| Rainfall | 0.34 | 0.24 | 170 | 1.41 | 0.16 |
| Snowfall | 0.67 | 0.44 | 170 | 1.54 | 0.13 |
| Relative humidity | *0.16* | *0.09* | 170 | *1.74* | *0.08* |
| Temperature | **-0.36** | **0.11** | 170 | **-3.65** | **0.00** |

| **Later snow disappearance** | Value | Standard error | Degrees freedom | t-value | p-value |
| --- | --- | --- | --- | --- | --- |
| Intercept | 0.03 | 0.07 | 101 | 0.45 | 0.65 |
| Precipitation | 0.07 | 0.07 | 101 | 0.97 | 0.34 |
| No precipitation | -0.56 | 0.48 | 101 | -1.17 | 0.25 |
| Rainfall | -0.21 | 0.31 | 101 | -0.69 | 0.49 |
| Snowfall | -0.38 | 0.57 | 101 | -0.67 | 0.50 |
| Relative humidity | *-0.16* | *0.09* | 101 | *-1.75* | *0.08* |
| Temperature | **-0.59** | **0.12** | 101 | **-4.96** | **0.00** |

**Table S6** Results of the linear mixed-effect model for predicting the ignition timing of early season fires in relation to snow disappearance timing, fuel moisture codes, and meteorological variables for all ecoregions combined, ecoregions with earlier snow disappearance timing, and later snow disappearance timing. The values in **bold** indicate significant predictors (*p* < 0.05) and values in *italic* also represent significant predictors (*p* < 0.1).

| **All** | Value | Standard error | Degrees freedom | t-value | p-value |
| --- | --- | --- | --- | --- | --- |
| Intercept | 0.00 | 0.06 | 278 | 0.01 | 1.00 |
| Snow disappearance | **0.42** | **0.05** | **278** | **8.29** | **0.00** |
| Convective available potential energy | *-0.09* | *0.05* | *278* | *-1.68* | *0.09* |
| Precipitation | 0.07 | 0.05 | 278 | 1.21 | 0.23 |
| Relative humidity | **0.18** | **0.07** | **278** | **2.67** | **0.01** |
| Temperature | *-0.11* | *0.07* | *278* | *-1.63* | *0.10* |
|  |  |  |  |  |  |
| Intercept | 0.00 | 0.05 | 280 | 0.00 | 1.00 |
| Fine fuel moisture code | **-0.15** | **0.06** | **280** | **-2.48** | **0.01** |
| Duff moisture code | **-0.30** | **0.07** | **280** | **-4.35** | **0.00** |
| Drought code | 0.05 | 0.07 | 280 | -0.70 | 0.48 |

| **Early snow disappearance** | Value | Standard error | Degrees freedom | t-value | p-value |
| --- | --- | --- | --- | --- | --- |
| Intercept | 0.03 | 0.06 | 171 | 0.48 | 0.63 |
| Snow disappearance | **0.36** | **0.06** | **171** | **6.51** | **0.00** |
| Convective available potential energy | -0.08 | 0.06 | 171 | -1.36 | 0.18 |
| Precipitation | **0.18** | **0.06** | **171** | **2.93** | **0.00** |
| Relative humidity | **0.15** | **0.08** | **171** | **2.02** | **0.04** |
| Temperature | **-0.20** | **0.08** | **171** | **-2.57** | **0.01** |
|  |  |  |  |  |  |
| Intercept | 0.02 | 0.06 | 173 | 0.28 | 0.78 |
| Fine fuel moisture code | **-0.17** | **0.07** | **173** | **-2.61** | **0.01** |
| Duff moisture code | **0.30** | **0.08** | **173** | **-3.75** | **0.00** |
| Drought code | *0.13* | *0.07* | *173* | *1.84* | *0.07* |

| **Late snow disappearance** | Value | Standard error | Degrees freedom | t-value | p-value |
| --- | --- | --- | --- | --- | --- |
| Intercept | -0.04 | 0.11 | 102 | -0.34 | 0.74 |
| Snow disappearance | **0.55** | **0.10** | **102** | **5.50** | **0.00** |
| Convective available potential energy | -0.07 | 0.11 | 102 | -0.61 | 0.54 |
| Precipitation | -0.09 | 0.10 | 102 | -0.82 | 0.41 |
| Relative humidity | *0.25* | *0.13* | *102* | *1.87* | *0.06* |
| Temperature | -0.00 | 0.12 | 102 | -0.01 | 0.99 |
|  |  |  |  |  |  |
| Intercept | -0.08 | 0.10 | 104 | -0.82 | 0.41 |
| Fine fuel moisture code | -0.06 | 0.13 | 104 | -0.44 | 0.66 |
| Duff moisture code | **-0.34** | **0.13** | **104** | **-2.64** | **0.01** |
| Drought code | *-0.29* | *0.15* | *104* | *-1.89* | *0.06* |

**Table S7** Results of variance partitioning for predicting snow disappearance timing in relation to different meteorological variables for all ecoregions combined, ecoregions with earlier and later snow disappearance timing. Precipitation type is a grouped variable consisting of number of days with snowfall, rainfall or no precipitation, The variance partitioning for the ignition timing in relation to different grouped variables (snow disappearance timing, weather variables after the snow disappearance timing, and fire weather variables) for all ecoregions combined (*n* = 299), ecoregion with earlier trends (*n* = 186) and later snow disappearance timing trends (*n* = 113). The values express the adjusted R2 values for the unique variation explained by the different variables and the shared variance between these groups. The shared variation cannot be tested, and a negative shared variation indicates no relationship between the explanatory and response variables. All values indicated in **bold** and *italic* are significant (*p* < 0.05 and *p* < 0.1)

*Variance partitioning, snow disappearance*

| Ecoregions | Precipitation | Precipitation type | Relative humidity | Temperature | Shared | Residual | Explained |
| --- | --- | --- | --- | --- | --- | --- | --- |
| All | **0.02** | 0.00 | **0.04** | **0.15** | 0.00 | 0.80 | 0.20 |
| Early snow disappearance | 0.00 | 0.00 | **0.11** | **0.12** | 0.00 | 0.76 | 0.24 |
| Late snow disappearance | **0.04** | 0.00 | 0.01 | **0.18** | 0.00 | 0.77 | 0.23 |

*Variance partitioning, ignition*

| Ecoregions | Snow disappearance | Weather | Fire weather | Shared | Residual | Explained |
| --- | --- | --- | --- | --- | --- | --- |
| All | **0.13** | **0.12** | **0.06** | 0.00 | 0.69 | 0.31 |
| Early snow disappearance | **0.14** | **0.19** | **0.09** | 0.00 | 0.58 | 0.42 |
| Late snow disappearance | **0.13** | **0.07** | **0.07** | 0.00 | 0.72 | 0.28 |

**Table S8** The values of R based on linear models between the response variables (snow disappearance and ignition timing (day of the year)) and the hypothesized explanatory variables for all ecoregions (*n* = 299), ecoregions with earlier (*n* = 186) and later snow disappearance timing trends (*n* = 113). For snow disappearance timing, we evaluated all meteorological variables 30 days prior to the day of snow disappearance. For ignition timing, we evaluated all the fire weather and meteorological variables between the snow disappearance and ignition timing. Values represented in **bold** are significant at *p* < 0.05, while values in *italic* are significant at levels of *p* < 0.1. All variables where included in the variance partitioning analysis.

| Snow disappearance | Precipitation | No precipitation | Rainfall | Snowfall | Relative humidity | Temperature |
| --- | --- | --- | --- | --- | --- | --- |
| All | **0.14** | **-0.49** | **-0.25** | **0.55** | **0.28** | **-0.59** |
| Earlier snow disappearance | 0.11 | **-0.45** | **-0.23** | **0.50** | **0.35** | **-0.52** |
| Later snow disappearance | *0.17* | **-0.57** | **-0.31** | **0.63** | *0.16* | **-***0.71* |

| Ignition | Fine fuel moisture code | Duff moisture coed | Drought code | Convective available potential energy | Precipitation | Relative humidity | Temperature | Snow disappearance |
| --- | --- | --- | --- | --- | --- | --- | --- | --- |
| All | **-0.27** | **-0.34** | **-0.17** | **-0.13** | *0.10* | **0.35** | **-0.39** | **0.50** |
| Earlier snow disappearance | **-0.29** | **-0.32** | -0.10 | **-0.17** | **0.16** | **0.39** | **-0.43** | **0.46** |
| Later snow disappearance | **-0.25** | **-0.38** | **-0.32** | -0.08 | 0.03 | **0.32** | **-0.35** | **0.56** |

**Table S9** The number of observations, direction and strength of the relationship, significance level, and correlation between snow disappearance and ignition timing lightning and anthropogenic ignitions, and ignitions with unknown cause, between 2001 and 2019. Values in **bold** indicate significance level of *p* < 0.05, and values in *italic* represent significance level of *p* < 0.1.

| **Lightning cause** | Observations | Slope | Correlation |
| --- | --- | --- | --- |
| Alaska Boreal Interior | 138 | 0.02 | 0.02 |
| Alaska Tundra | 32 | 0.12 | 0.16 |
| Boreal Cordillera | **93** | **0.64** | **0.60** |
| Boreal Plain | 42 | 0.37 | 0.23 |
| Brooks Range Tundra | *14* | *0.91* | *0.49* |
| Cold Deserts | **33** | **0.71** | **0.48** |
| Hudson Plain | **64** | **0.65** | **0.49** |
| Marine West Coast Forest | **26** | **0.39** | **0.46** |
| Mixed Wood Shield | **18** | **1.03** | **0.52** |
| Eastern Softwood Shield | **93** | **0.82** | **0.80** |
| Western Softwood Shield | **276** | **0.70** | **0.42** |
| Taiga Cordillera | **74** | **0.40** | **0.37** |
| Taiga Plain | **172** | **0.51** | **0.39** |
| Eastern Taiga Shield | **53** | **1.05** | **0.60** |
| Western Taiga Shield | **197** | **0.77** | **0.51** |
| Western Cordillera | **233** | **0.44** | **0.39** |

| **Anthropogenic cause** | Observations | Slope | Correlation |
| --- | --- | --- | --- |
| Alaska Boreal Interior | 19 | 0.21 | 0.10 |
| Alaska Tundra | 0 | nan | nan |
| Boreal Cordillera | **17** | **0.35** | **0.54** |
| Boreal Plain | **77** | **0.35** | **0.38** |
| Brooks Range Tundra | 0 | nan | nan |
| Cold Deserts | 38 | 0.47 | 0.24 |
| Hudson Plain | **8** | **2.42** | **0.81** |
| Marine West Coast Forest | **13** | **0.53** | **0.81** |
| Mixed Wood Shield | *32* | *0.67* | *0.31* |
| Eastern Softwood Shield | **39** | **0.94** | **0.76** |
| Western Softwood Shield | **50** | **0.71** | **0.67** |
| Taiga Cordillera | 0 | nan | nan |
| Taiga Plain | **20** | **0.44** | **0.52** |
| Eastern Taiga Shield | *5* | *1.18* | *0.82* |
| Western Taiga Shield | 2 | 1.47 | 1.00 |
| Western Cordillera | **94** | **0.63** | **0.34** |

| **Unknown cause** | Observations | Slope | Correlation |
| --- | --- | --- | --- |
| Alaska Boreal Interior | **58** | **0.73** | **0.56** |
| Alaska Tundra | 8 | 0.15 | 0.28 |
| Boreal Cordillera | **122** | **0.59** | **0.65** |
| Boreal Plain | **346** | **0.46** | **0.36** |
| Brooks Range Tundra | 11 | 0.53 | 0.36 |
| Cold Deserts | **137** | **1.06** | **0.43** |
| Hudson Plain | **39** | **0.99** | **0.68** |
| Marine West Coast Forest | **113** | **0.44** | **0.42** |
| Mixed Wood Shield | **77** | **1.68** | **0.43** |
| Eastern Softwood Shield | **57** | **0.68** | **0.61** |
| Western Softwood Shield | **110** | **0.58** | **0.37** |
| Taiga Cordillera | **25** | **0.51** | **0.52** |
| Taiga Plain | **66** | **0.77** | **0.56** |
| Eastern Taiga Shield | **66** | **0.29** | **0.25** |
| Western Taiga Shield | **55** | **0.89** | **0.52** |
| Western Cordillera | **587** | **0.84** | **0.52** |

**Table S10** Average fire size (×102 hectare ± standard deviation) for fires ignited earlier and later than the earliest 20th percentile day of ignition timing and the duration of the snow-free season and fire season per ecoregion between 2001 and 2019. Values in bold indicate significant trends at *p* < 0.05, and values in *italic* represent significant trends at *p* < 0.1.

| Ecoregion | Early fire size (×102 ha ± SD) | Late fire size (×102 ha ± SD) | Fraction of early burned area (%) | Fraction of late burned area (%) | Duration of snow-free season trend, 2001-2019 (days dec-1) | Fire season change trend, 2001-2019 (day dec-1) |
| --- | --- | --- | --- | --- | --- | --- |
| Alaska Boreal Interior | 255.3 ± 499.5 | 197.9 ± 433.1 | 27.1% | 72.9% | *7.10* | 1.73 |
| Alaska Tundra | 39.3 ± 84.5 | 53.3 ± 147.0 | 26.7% | 73.3% | **13.84** | 25.25 |
| Boreal Cordillera | 188.1 ± 625.8 | 104.5 ± 334.4 | 33.7% | 66.3% | *7.52* | 3.11 |
| Boreal Plain | 66.0 ± 412.0 | 43.5 ± 288,2 | 28.4% | 71.6% | -7.56 | -12.22 |
| Brooks Range Tundra | 69.6 ± 206.5 | 15.7 ± 36.1 | 73.0% | 27.0% | -0.50 | 11.74 |
| Cold Deserts | 21.4 ± 111.2 | 4.3 ± 13.5 | 56.9% | 43.1% | 0.79 | **-26.62** |
| Hudson Plain | 138.3 ± 536.8 | 57.6 ± 404.8 | 41.0% | 59.0% | -7.15 | -12.64 |
| Marine West Coast Forest | 24.2 ± 99.8 | 8.1 ± 102.6 | 45.1% | 54.9% | 15.67 | 10.41 |
| Mixed Wood Shield | 26.1 ± 132.7 | 7.2 ± 34.4 | 52.1% | 47.9% | -9.80 | -19.52 |
| Eastern Softwood Shield | 106.4 ± 476.4 | 181.1 ± 473.3 | 20.9% | 79.1% | -4.65 | -9.34 |
| Western Softwood Shield | 234.7 ± 744.0 | 105.2 ± 410.5 | 37.9% | 62.1% | -0.97 | **-28.74** |
| Taiga Cordillera | 213.3 ± 636.8 | 88.0 ± 382.9 | 44.4% | 55.6% | *5.99* | 1.65 |
| Taiga Plain | 271.2 ± 1100.8 | 194.1 ± 1007.7 | 28.3% | 71.7% | **5.73** | -22.26 |
| Eastern Taiga Shield | 76.3 ± 203.8 | 56.9 ± 193.3 | 31.8% | 68.2% | **-12.95** | 9.36 |
| Western Taiga Shield | 328.5 ± 917.3 | 146.1 ± 611.1 | 39.2% | 60.8% | 1.05 | 10.42 |
| Western Cordillera | 86.2 ± 472.8 | 12.6 ± 123.5 | 63.8% | 36.2% | -0.07 | -14.84 |

**Table S11** The piecewise structural equation model (pSEM) for the Moderate Resolution Imaging Spectroradiometer (MODIS) snow disappearance timing, ignition timing, for all ecoregions combined. The results show the standardized estimates of paths from predictor variables to response variables scaled for the ratio of standard deviation of the response and explanatory variables. The weather variables are divided into prior to snow disappearance timing (pre) and after the snow disappearance timing (post) while the fuel moisture codes are only derived for days after the snow disappearance timing. The effect sizes were used to scale the arrows in Figure 5. All variables in **bold** and *italic* indicate significant effect size (*p* < 0.05, *p* < 0.1). The number of ignitions analyzed, Fisher’s C statistics, the corresponding p-value, and the Akaike information criterion (AIC) were derived for the whole pSEM. The model resembles the hypothesized pSEM when *p* > 0.05. Marginal R2 (M-R2) and conditional R2 (C-R2) values are derived for each response variable and represent the variation explained solely by the fixed effects, and the fixed and random effects combined, respectively.

| Response | Predictor | Standardized estimate |
| --- | --- | --- |
| Snow disappearance timing | Pre precipitation | 0.03 |
|  | Snowfall | 0.42 |
|  | Rainfall | 0.21 |
|  | No precipitation | 0.17 |
|  | Pre relative humidity | 0.02 |
|  | Pre temperature | **-0.46** |
| Snowfall | Pre precipitation | 0.04 |
|  | Pre temperature | **-0.81** |
| Rainfall | Pre precipitation | **0.36** |
|  | Pre temperature | **0.56** |
| Ignition timing | Snow disappearance | **0.42** |
|  | Fine fuel moisture code | **-0.15** |
|  | Duff moisture code | **-0.30** |
|  | Drought code | 0.04 |
|  | Post convective available potential energy | *-0.09* |
|  | Post precipitation | 0.06 |
|  | Post relative humidity | **0.18** |
|  | Post temperature | *-0.11* |
| Fine fuel moisture code | Snow disappearance timing | **-0.10** |
|  | Post precipitation | **-0.27** |
|  | Post relative humidity | **-0.28** |
|  | Post temperature | *0.08* |
| Duff moisture code | Snow disappearance timing | **-0.13** |
|  | Post precipitation | **-0.09** |
|  | Post relative humidity | **-0.43** |
|  | Post temperature | **0.33** |
| Drought code | Snow disappearance timing | **-0.13** |
|  | Post precipitation | **-0.20** |
|  | Post temperature | **0.13** |
| Post precipitation | Snow disappearance timing | -0.07 |
| Post relative humidity | Snow disappearance timing | **0.21** |
| Post temperature | Snow disappearance timing | **-0.35** |
| Post convective available potential energy | Snow disappearance timing | **-0.13** |
|  | | |
| Fine fuel moisture code - - duff moisture code | | **0.24** |
| Fine fuel moisture code - - drought code | | **0.13** |
| Duff moisture code - - drought code | | **0.48** |
| No precipitation - - pre precipitation | | **-0.36** |
| No precipitation - - rainfall | | **-0.25** |
| No precipitation - - snowfall | | **-0.51** |
| Snowfall - - rainfall | | **-0.35** |

*n* = 299
Fisher’s C80 = 82.24, *p* = 0.41, AIC = 220.24

Snow disappearance: M-R2 = 0.38, C-R2 = 0.38
Rainfall: M-R2 = 0.41, C-R2 = 0.41
Snowfall: M-R2 = 0.67, C-R2 = 0.67
Ignition, fire weather: M-R2 = 0.14, C-R2 = 0.14
Ignition, weather: M-R2 = 0.34, C-R2 = 0.36
Fine fuel moisture code: M-R2 = 0.27, C-R2 = 0.66
Duff moisture code: M-R2 = 0.58, C-R2 = 0.61
Drought code: M-R2 = 0.09, C-R2 = 0.09
Convective Available Potential Energy: M-R2 = 0.02, C-R2 = 0.02
Precipitation: M-R2 = 0.01, C-R2 = 0.01
Relative humidity: M-R2 = 0.05, C-R2 = 0.06
Temperature: M-R2 = 0.12, C-R2 = 0.13

**Table S12** The piecewise structural equation model (pSEM) for the Moderate Resolution Imaging Spectroradiometer (MODIS) snow disappearance timing, MODIS ignition timing, fuel moisture code, and duff moisture code for all ecoregions exhibiting earlier snow disappearance timing trends. The results show the standardized estimates of paths from predictor variables to response variables scaled for the ratio of standard deviation of the response and explanatory variables. The weather variables are divided into prior to snow disappearance timing (pre) and after the snow disappearance timing (post). The effect sizes were used to scale the arrows in Figure S7a. All variables in **bold** and *italic* indicate significant effect size (*p* < 0.05, *p* < 0.1). The number of ignitions analyzed, Fisher’s C statistics, the corresponding p-value, and the Akaike information criterion (AIC) were derived for the whole pSEM. The model resemble the hypothesized pSEM when *p* > 0.05. Marginal R2 (M-R2) and conditional R2 (C-R2) values are derived for each response variable and represent the variation explained solely by the fixed effects, and the fixed and random effects combined, respectively.

| Response | Predictor | Standardized estimate |
| --- | --- | --- |
| Snow disappearance timing | Pre precipitation | 0.00 |
|  | Snowfall | 0.71 |
|  | Rainfall | 0.36 |
|  | No precipitation | 0.45 |
|  | Pre relative humidity | *0.15* |
|  | Pre temperature | **-0.37** |
| Snowfall | Pre precipitation | **0.10** |
|  | Pre temperature | **-0.82** |
| Rainfall | Pre precipitation | **0.37** |
|  | Pre temperature | **0.57** |
| Ignition timing | Snow disappearance | **0.40** |
|  | Fine fuel moisture code | -**0.20** |
|  | Duff moisture code | **-0.34** |
|  | Drought code | *0.16* |
|  | Post convective available potential energy | -0.09 |
|  | Post precipitation | **0.19** |
|  | Post relative humidity | **0.16** |
|  | Post temperature | **-0.21** |
| Fine fuel moisture code | Snow disappearance timing | *-0.09* |
|  | Post precipitation | **-0.31** |
|  | Post relative humidity | **-0.25** |
|  | Post temperature | 0.05 |
| Duff moisture code | Snow disappearance timing | **-0.11** |
|  | Post precipitation | **-0.12** |
|  | Post relative humidity | **-0.49** |
|  | Post temperature | **0.31** |
| Drought code | Snow disappearance timing | -0.09 |
|  | Post precipitation | **-0.17** |
|  | Post temperature | **0.17** |
| Post precipitation | Snow disappearance timing | *-0.14* |
| Post relative humidity | Snow disappearance timing | **0.15** |
| Post temperature | Snow disappearance timing | **-0.27** |
| Convective available potential energy | Snow disappearance timing | **-0.15** |
|  | | |
| Fine fuel moisture code - - duff moisture code | | **0.27** |
| Fine fuel moisture code - - drought code | | **0.19** |
| Duff moisture code - - drought code | | **0.55** |
| No precipitation - - pre precipitation | | **-0.41** |
| No precipitation - - rainfall | | **-0.23** |
| No precipitation - - snowfall | | **-0.50** |
| Snowfall - - rainfall | | **-0.35** |

*n* = 186
Fisher’s C86 = 96.31, *p* = 0.21, AIC = 234.31

Snow disappearance: M-R2 = 0.32, C-R2 = 0.32
Snowfall: M-R2 = 0.68, C-R2 = 0.68
Rainfall: M-R2 = 0.45, C-R2 = 0.45
Ignition, fire weather: M-R2 = 0.15, C-R2 = 0.15
Ignition, weather: M-R2 = 0.39, C-R2 = 0.39
Fine fuel moisture code: M-R2 = 0.24, C-R2 = 0.68
Duff moisture code: M-R2 = 0.59, C-R2 = 0.61
Drought code: M-R2 = 0.07, C-R2 = 0.07
Convective Available Potential Energy: M-R2 = 0.02, C-R2 = 0.03
Precipitation: M-R2 = 0.02, C-R2 = 0.02
Relative humidity: M-R2 = 0.02, C-R2 = 0.03
Temperature: M-R2 = 0.07, C-R2 = 0.08

**Table S13** The piecewise structural equation model (pSEM) for the Moderate Resolution Imaging Spectroradiometer (MODIS) snow disappearance timing, MODIS ignition timing, fuel moisture code, and duff moisture code for all ecoregions exhibiting later snow disappearance timing trends. The results show the standardized estimates of paths from predictor variables to response variables scaled for the ratio of standard deviation of the response and explanatory variables. The weather variables are divided into prior to snow disappearance timing (pre) and after the snow disappearance timing (post). The effect sizes were used to scale the arrows in Figure S7b. All variables in **bold** and *italic* indicate significant effect size (*p* < 0.05, *p* < 0.1). The number of ignitions analyzed, Fisher’s C statistics, the corresponding p-value, and the Akaike information criterion (AIC) were derived for the whole pSEM. The model resemble the hypothesized pSEM when *p* > 0.05. Marginal R2 (M-R2) and conditional R2 (C-R2) values are derived for each response variable and represent the variation explained solely by the fixed effects, and the fixed and random effects combined, respectively.

| Response | Predictor | Standardized estimate |
| --- | --- | --- |
| Snow disappearance timing | Pre precipitation | 0.08 |
|  | Snowfall | -0.35 |
|  | Rainfall | -0.19 |
|  | No precipitation | -0.51 |
|  | Pre relative humidity | *-0.16* |
|  | Pre temperature | **-0.58** |
| Snowfall | Pre precipitation | -0.03 |
|  | Pre temperature | **-0.82** |
| Rainfall | Pre precipitation | **0.35** |
|  | Pre temperature | **0.53** |
| Ignition timing | Snow disappearance | **0.49** |
|  | Fine fuel moisture code | -0.05 |
|  | Duff moisture code | **-0.28** |
|  | Drought code | **-0.19** |
|  | Post convective available potential energy | -0.05 |
|  | Post precipitation | -0.08 |
|  | Post relative humidity | *0.23* |
|  | Post temperature | -0.00 |
| Fine fuel moisture code | Snow disappearance timing | *-0.11* |
|  | Post precipitation | **-0.17** |
|  | Post relative humidity | **-0.36** |
|  | Post temperature | *0.15* |
| Duff moisture code | Snow disappearance timing | -**0.19** |
|  | Post precipitation | -0.11 |
|  | Post relative humidity | **-0.27** |
|  | Post temperature | **0.41** |
| Drought code | Snow disappearance timing | **-0.26** |
|  | Post precipitation | **-0.34** |
|  | Post temperature | 0.02 |
| Post precipitation | Snow disappearance timing | 0.01 |
| Post relative humidity | Snow disappearance timing | **0.30** |
| Post temperature | Snow disappearance timing | **-0.46** |
| Convective available potential energy | Snow disappearance timing | -0.10 |
|  | | |
| Fine fuel moisture code - - duff moisture code | | **0.18** |
| Fine fuel moisture code - - drought code | | 0.01 |
| Duff moisture code - - drought code | | **0.26** |
| No precipitation - - pre precipitation | | **-0.31** |
| No precipitation - - rainfall | | **-0.24** |
| No precipitation - - snowfall | | **-0.48** |
| Snowfall - - rainfall | | **-0.40** |

*n* = 113
Fisher’s C112 = 107.14, *p* = 0.61, AIC = 245.14

Snow disappearance: M-R2 = 0.53, C-R2 = 0.53
Snowfall: M-R2 = 0.67, C-R2 = 0.67
Rainfall: M-R2 = 0.34, C-R2 = 0.34
Ignition, fire weather: M-R2 = 0.18, C-R2 = 0.18
Ignition, weather: M-R2 = 0.35, C-R2 = 0.37
Fine fuel moisture code: M-R2 = 0.36, C-R2 = 0.65
Duff moisture code: M-R2 = 0.60, C-R2 = 0.67
Drought code: M-R2 = 0.19, C-R2 = 0.23
Convective Potential Available Energy: M-R2 = 0.01, C-R2 = 0.01
Precipitation: M-R2 = 0.00, C-R2 = 0.00
Relative humidity: M-R2 = 0.09, C-R2 = 0.09
Temperature: M-R2 = 0.21, C-R2 = 0.21

**Table S14** The piecewise structural equation model (pSEM) for the Moderate Resolution Imaging Spectroradiometer (MODIS) snow disappearance timing, ignition timing, for all ecoregions combined with vapor pressure deficit as a substitute for relative humidity and air temperature. The results show the standardized estimates of paths from predictor variables to response variables scaled for the ratio of standard deviation of the response and explanatory variables. The weather variables are divided into prior to snow disappearance timing (pre) and after the snow disappearance timing (post) while the fuel moisture codes are only derived for days after the snow disappearance timing. The effect sizes were used to scale the arrows in Figure S9. All variables in **bold** and *italic* indicate significant effect size (*p* < 0.05, *p* < 0.1). The number of ignitions analyzed, Fisher’s C statistics, the corresponding p-value, and the Akaike information criterion (AIC) were derived for the whole pSEM. The model resembles the hypothesized pSEM when *p* > 0.05. Marginal R2 (M-R2) and conditional R2 (C-R2) values are derived for each response variable and represent the variation explained solely by the fixed effects, and the fixed and random effects combined, respectively.

| Response | Predictor | Standardized estimate |
| --- | --- | --- |
| Snow disappearance timing | Pre precipitation | 0.00 |
|  | Snowfall | **0.70** |
|  | Rainfall | 0.25 |
|  | No precipitation | 0.36 |
|  | Pre vapor pressure deficit | **-0.37** |
| Snowfall | Pre precipitation | **0.43** |
|  | Pre vapor pressure deficit | **0.42** |
| Rainfall | Pre precipitation | **-0.11** |
|  | Pre vapor pressure deficit | **-0.79** |
| Ignition timing | Snow disappearance | **0.45** |
|  | Fine fuel moisture code | **-0.15** |
|  | Duff moisture code | **-0.30** |
|  | Drought code | 0.05 |
|  | Post convective available potential energy | *-0.09* |
|  | Post precipitation | 0.09 |
|  | Post vapor pressure deficit | **-0.23** |
| Fine fuel moisture code | Snow disappearance timing | **-0.12** |
|  | Post precipitation | **-0.31** |
|  | Relative humidity | ***0.29*** |
|  | Post temperature | ***-0.18*** |
| Duff moisture code | Snow disappearance timing | **-0.18** |
|  | Post precipitation | **-0.10** |
|  | Vapor pressure deficit | **0.67** |
| Drought code | Snow disappearance timing | **-0.12** |
|  | Post precipitation | **-0.15** |
|  | Post temperature | **0.22** |
| Post precipitation | Snow disappearance timing | -0.07 |
| Post vapor pressure deficit | Snow disappearance timing | **-0.23** |
| Post convective available potential energy | Snow disappearance timing | **-0.13** |
|  | | |
| Fine fuel moisture code - - duff moisture code | | **0.26** |
| Fine fuel moisture code - - drought code | | **0.16** |
| Duff moisture code - - drought code | | **0.51** |
| No precipitation - - pre precipitation | | **-0.36** |
| No precipitation - - rainfall | | **-0.14** |
| No precipitation - - snowfall | | **-0.45** |
| Snowfall - - rainfall | | **-0.55** |

*n* = 299
Fisher’s C60 = 58.57, *p* = 0.53, AIC = 180.57

Snow disappearance: M-R2 = 0.36, C-R2 = 0.36
Rainfall: M-R2 = 0.26, C-R2 = 0.26
Snowfall: M-R2 = 0.59, C-R2 = 0.59
Ignition, fire weather: M-R2 = 0.14, C-R2 = 0.14
Ignition, weather: M-R2 = 0.35, C-R2 = 0.35
Fine fuel moisture code: M-R2 = 0.25, C-R2 = 0.65
Duff moisture code: M-R2 = 0.59, C-R2 = 0.62
Drought code: M-R2 = 0.11, C-R2 = 0.11
Convective Available Potential Energy: M-R2 = 0.02, C-R2 = 0.02
Precipitation: M-R2 = 0.01, C-R2 = 0.01
Vapor pressure deficit: M-R2 = 0.06, C-R2 = 0.07

**Table S15** The piecewise structural equation model (pSEM) for the Moderate Resolution Imaging Spectroradiometer (MODIS) snow disappearance timing and MODIS ignition timing for all ecoregions exhibiting earlier snow disappearance timing trends with vapor pressure deficit as a substitute for relative humidity and air temperature. The results show the standardized estimates of paths from predictor variables to response variables scaled for the ratio of standard deviation of the response and explanatory variables. The weather variables are divided into prior to snow disappearance timing (pre) and after the snow disappearance timing (post). The effect sizes were used to scale the arrows in Figure S7a. All variables in **bold** and *italic* indicate significant effect size (*p* < 0.05, *p* < 0.1). The number of ignitions analyzed, Fisher’s C statistics, the corresponding p-value, and the Akaike information criterion (AIC) were derived for the whole pSEM. The model resemble the hypothesized pSEM when *p* > 0.05. Marginal R2 (M-R2) and conditional R2 (C-R2) values are derived for each response variable and represent the variation explained solely by the fixed effects, and the fixed and random effects combined, respectively.

| Response | Predictor | Standardized estimate |
| --- | --- | --- |
| Snow disappearance timing | Pre precipitation | 0.00 |
|  | Snowfall | 0.71 |
|  | Rainfall | 0.36 |
|  | No precipitation | 0.45 |
|  | Pre relative humidity | *0.15* |
|  | Pre temperature | **-0.37** |
| Snowfall | Pre precipitation | **0.10** |
|  | Pre temperature | **-0.82** |
| Rainfall | Pre precipitation | **0.37** |
|  | Pre temperature | **0.57** |
| Ignition timing | Snow disappearance | **0.40** |
|  | Fine fuel moisture code | -**0.20** |
|  | Duff moisture code | **-0.34** |
|  | Drought code | *0.16* |
|  | Post convective available potential energy | -0.09 |
|  | Post precipitation | **0.19** |
|  | Post relative humidity | **0.16** |
|  | Post temperature | **-0.21** |
| Fine fuel moisture code | Snow disappearance timing | *-0.09* |
|  | Post precipitation | **-0.31** |
|  | Post relative humidity | **-0.25** |
|  | Post temperature | 0.05 |
| Duff moisture code | Snow disappearance timing | **-0.11** |
|  | Post precipitation | **-0.12** |
|  | Post relative humidity | **-0.49** |
|  | Post temperature | **0.31** |
| Drought code | Snow disappearance timing | -0.09 |
|  | Post precipitation | **-0.17** |
|  | Post temperature | **0.17** |
| Post precipitation | Snow disappearance timing | *-0.14* |
| Post relative humidity | Snow disappearance timing | **0.15** |
| Post temperature | Snow disappearance timing | **-0.27** |
| Convective available potential energy | Snow disappearance timing | **-0.15** |
|  | | |
| Fine fuel moisture code - - duff moisture code | | **0.27** |
| Fine fuel moisture code - - drought code | | **0.19** |
| Duff moisture code - - drought code | | **0.55** |
| No precipitation - - pre precipitation | | **-0.41** |
| No precipitation - - rainfall | | **-0.23** |
| No precipitation - - snowfall | | **-0.50** |
| Snowfall - - rainfall | | **-0.35** |

*n* = 186
Fisher’s C58 = 52.99, *p* = 0.66, AIC = 174.99

Snow disappearance: M-R2 = 0.31, C-R2 = 0.32
Snowfall: M-R2 = 0.65, C-R2 = 0.65
Rainfall: M-R2 = 0.32, C-R2 = 0.32
Ignition, fire weather: M-R2 = 0.15, C-R2 = 0.15
Ignition, weather: M-R2 = 0.37, C-R2 = 0.38
Fine fuel moisture code: M-R2 = 0.22, C-R2 = 0.66
Duff moisture code: M-R2 = 0.61, C-R2 = 0.62
Drought code: M-R2 = 0.12, C-R2 = 0.12
Convective Available Potential Energy: M-R2 = 0.02, C-R2 = 0.03
Precipitation: M-R2 = 0.02, C-R2 = 0.02
Vapor pressure deficit: M-R2 = 0.02, C-R2 = 0.03

**Table S16** The piecewise structural equation model (pSEM) for the Moderate Resolution Imaging Spectroradiometer (MODIS) snow disappearance timing and MODIS ignition timing for all ecoregions exhibiting later snow disappearance timing trends with vapor pressure deficit as a substitute for relative humidity and air temperature. The results show the standardized estimates of paths from predictor variables to response variables scaled for the ratio of standard deviation of the response and explanatory variables. The weather variables are divided into prior to snow disappearance timing (pre) and after the snow disappearance timing (post). The effect sizes were used to scale the arrows in Figure S7b. All variables in **bold** and *italic* indicate significant effect size (*p* < 0.05, *p* < 0.1). The number of ignitions analyzed, Fisher’s C statistics, the corresponding p-value, and the Akaike information criterion (AIC) were derived for the whole pSEM. The model resemble the hypothesized pSEM when *p* > 0.05. Marginal R2 (M-R2) and conditional R2 (C-R2) values are derived for each response variable and represent the variation explained solely by the fixed effects, and the fixed and random effects combined, respectively.

| Response | Predictor | Standardized estimate |
| --- | --- | --- |
| Snow disappearance timing | Pre precipitation | 0.02 |
|  | Snowfall | 0.57 |
|  | Rainfall | 0.09 |
|  | No precipitation | 0.14 |
|  | Pre vapor pressure deficit | **-0.33** |
| Snowfall | Pre precipitation | **0.39** |
|  | Pre vapor pressure deficit | **0.38** |
| Rainfall | Pre precipitation | **-0.14** |
|  | Pre vapor pressure deficit | **-0.77** |
| Ignition timing | Snow disappearance | **0.50** |
|  | Fine fuel moisture code | -0.05 |
|  | Duff moisture code | **-0.28** |
|  | Drought code | *-0.19* |
|  | Post convective available potential energy | -0.03 |
|  | Post precipitation | -0.04 |
|  | Post vapor pressure deficit | *-0.18* |
| Fine fuel moisture code | Snow disappearance timing | **-0.15** |
|  | Post precipitation | **-0.24** |
|  | Post vapor pressure deficit | **0.40** |
| Duff moisture code | Snow disappearance timing | -**0.24** |
|  | Post precipitation | -0.10 |
|  | Post vapor pressure deficit | **0.63** |
| Drought code | Snow disappearance timing | **-0.26** |
|  | Post precipitation | **-0.32** |
|  | Post vapor pressure deficit | 0.06 |
| Post precipitation | Snow disappearance timing | 0.01 |
| Post vapor pressure deficit | Snow disappearance timing | **-0.35** |
| Convective available potential energy | Snow disappearance timing | -0.10 |
|  | | |
| Fine fuel moisture code - - duff moisture code | | **0.18** |
| Fine fuel moisture code - - drought code | | 0.04 |
| Duff moisture code - - drought code | | **0.28** |
| No precipitation - - pre precipitation | | **-0.31** |
| No precipitation - - rainfall | | **-**0.11 |
| No precipitation - - snowfall | | **-0.46** |
| Snowfall - - rainfall | | **-0.58** |

*n* = 113
Fisher’s C84 = 78.10, *p* = 0.66, AIC = 200.10

Snow disappearance: M-R2 = 0.45, C-R2 = 0.45
Snowfall: M-R2 = 0.52, C-R2 = 0.54
Rainfall: M-R2 = 0.20, C-R2 = 0.20
Ignition, fire weather: M-R2 = 0.18, C-R2 = 0.18
Ignition, weather: M-R2 = 0.34, C-R2 = 0.36
Fine fuel moisture code: M-R2 = 0.33, C-R2 = 0.64
Duff moisture code: M-R2 = 0.63, C-R2 = 0.69
Drought code: M-R2 = 0.20, C-R2 = 0.23
Convective Potential Available Energy: M-R2 = 0.01, C-R2 = 0.01
Precipitation: M-R2 = 0.00, C-R2 = 0.00
Vapor pressure deficit: M-R2 = 0.12, C-R2 = 0.13
